# Supplementary material for: The Clinicopathological Features and Unusual Immunophenotype of Primary Tracheobronchial Granular Cell Tumors
Source: Research Square preprint supplement (doi:10.21203/rs.3.rs-1038406/v1), 2021-11-08
Supplement: Supplementary file 1 [file 4d25fa734cd6414a82e8f0b8.xlsx]

## Sheet: Sheet1
Table 2
Immunohistochemical staining results of GCTs according to the locations
IHC makers		Location
	Tracheobronchial	Subcutaneous tissues	Esophagus	P value
S100	4/4(100%)	4/4(100%)	3/3(100%)	1
Nestin	4/4(100%)	4/4(100%)	3/3(100%)	1
TFE-3	1/4(25%)	3/4(75%)	3/3(100%)	0.2
Caretinin	1/4(25%)	4/4(100%)	1/3(33%)	0.108
α-inhibin	0/4（0%）	0/4（0%）	0/3（0%）	1
CD68	4/4(100%)	3/3（100%）	2/2（100%）	1
TTF1	0/4（0%）	-	-	-
Ki67 index (%)	1~2	1~5	-	-
